# Supplementary material
Source: publisher site journal article supplement (http://www.spandidos-publications.com/347/downloadSupplementary)

Figure S1. Correlation of glioma cell density and MET uptake on PET. Tumor cell density is plotted as a function of the tumor-to-normal tissue ratio of MET accumulation. A linear regression analysis was performed. These two factors showed a positive correlation ( $P < 0.0001$ ) with a Pearson's correlation  $r$  value of 0.72. PET, positron emission tomography.

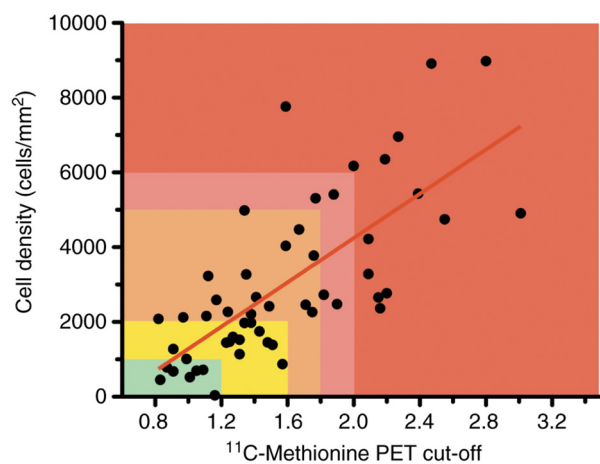

Supplement: Supplementary file 1 [file downloadSupplementary]
